## **Dynamics of the body centre of mass during actual acceleration across transition speed**

Veerle Segers, Peter Aerts, Matthieu Lenoir and Dirk De Clercq

10.1242/jeb.02760

There was an error published in *J. Exp. Biol.* **210**, 578-585.

The name of one author was mis-spelled on the title page. It should have been Dirk De Clercq and **not** Dirk De Clerq as published.

The correct list of authors is Veerle Segers, Peter Aerts, Matthieu Lenoir and Dirk De Clercq.

We apologise for any inconvenience this may have caused.
